# Supplementary material for: The Effects of a Therapeutic Strategy Guided by Lung Ultrasound on 6-Month Outcomes in Patients with Heart Failure: Results from the EPICC Randomized Controlled Trial
Source: J Clin Med. 2022 Aug 22;11(16):4930. doi: 10.3390/jcm11164930 (PMC9409707; doi:10.3390/jcm11164930)
Supplement: Supplementary file 1 [file jcm-11-04930-s001.zip › jcm-1822569-supplementary.pdf]

### Supplementary File S1. Futility analysis EPICC trial report.

To evaluate the possibility of continuing with the study, the following futility analysis was proposed, considering the hypotheses:

H0: There are no statistically significant differences between treatments.

H1: There are statistically significant differences between the treatments.

In case of rejecting the null hypothesis, it is concluded that the treatments behave significantly differently, and differences could be reached if the study continues.

If the null hypothesis is not rejected, it is concluded that the treatments behave in a similar way, so it would be futile to continue with it.

| Fixed Scenario Elements    |                      |
|----------------------------|----------------------|
| Distribution               | Asymptotic normal    |
| Method                     | Normal approximation |
| Number of Sides            | 1                    |
| Alpha                      | 0.05                 |
| Group 1 Proportion         | 0.43                 |
| Group 2 Proportion         | 0.2                  |
| Nominal Power              | 0.9                  |
| Null Proportion Difference | 0                    |

| Computed N per Group |             |
|----------------------|-------------|
| Actual Power         | N per Group |
| 0.900                | 68          |

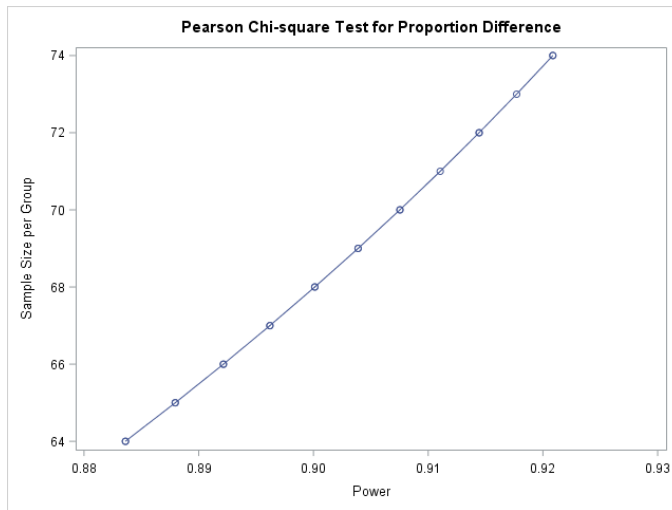

| Design Information                                   |                    |
|------------------------------------------------------|--------------------|
| Statistic Distribution                               | Normal             |
| Boundary Scale                                       | Standardized Z     |
| Alternative Hypothesis                               | Lower              |
| Early Stop                                           | Accept/Reject Null |
| Method                                               | O'Brien-Fleming    |
| Boundary Key                                         | Both               |
| Alternative Reference                                | -0.23              |
| Number of Stages                                     | 2                  |
| Alpha                                                | 0.025              |
| Beta                                                 | 0.1                |
| Power                                                | 0.9                |
| Max Information (Percent of Fixed Sample)            | 103.3104           |
| Max Information                                      | 205.2034           |
| Null Ref ASN (Percent of Fixed Sample)               | 68.5966            |
| Alt Ref ASN (Percent of Fixed Sample)                | 84.71245           |
| Adj Design Alpha                                     | 0.025              |
| Adj Design Beta                                      | 0.09683            |
| Adj Design Power                                     | 0.90317            |
| Adj Design Max Information (Percent of Fixed Sample) | 103.2283           |

| Design Information                                |          |
|---------------------------------------------------|----------|
| Adj Design Max Information                        | 207.3562 |
| Adj Design Null Ref ASN (Percent of Fixed Sample) | 68.753   |
| Adj Design Alt Ref ASN (Percent of Fixed Sample)  | 84.51339 |

| Method Information |                 |         |         |                |     |         |                       |          |
|--------------------|-----------------|---------|---------|----------------|-----|---------|-----------------------|----------|
| Boundary           | Method          | Alpha   | Beta    | Unified Family |     |         | Alternative Reference | Drift    |
|                    |                 |         |         | Rho            | Tau | C       |                       |          |
| Lower Beta         | O'Brien-Fleming | .       | 0.10000 | 0.5            | 0   | 1.33785 | -0.23                 | -3.29473 |
| Lower Alpha        | O'Brien-Fleming | 0.02500 | .       | 0.5            | 0   | 1.95688 | -0.23                 | -3.29473 |

| Boundary Information (Standardized Z Scale) |                   |          |          |             |                 |          |
|---------------------------------------------|-------------------|----------|----------|-------------|-----------------|----------|
| Null Reference = 0                          |                   |          |          |             |                 |          |
| _Stage_                                     |                   |          |          | Alternative | Boundary Values |          |
|                                             | Information Level |          |          | Reference   | Lower           |          |
|                                             | Proportion        | Actual   | N        | Lower       | Alpha           | Beta     |
| 1                                           | 0.5000            | 102.6017 | 83.12791 | -2.32973    | -2.76744        | -0.43772 |
| 2                                           | 1.0000            | 205.2034 | 166.2558 | -3.29473    | -1.95688        | -1.95688 |

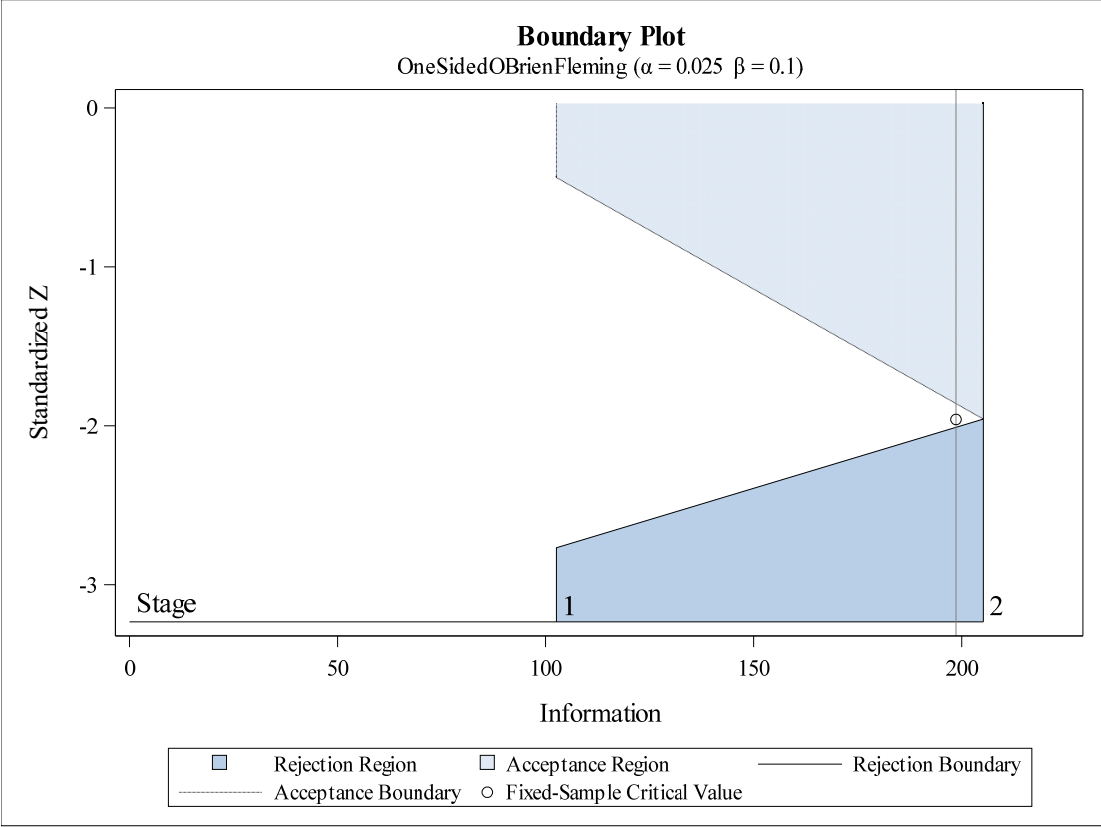

| Sample Size Summary             |                        |
|---------------------------------|------------------------|
| Test                            | Two-Sample Proportions |
| Null Proportion                 | 0.43                   |
| Proportion (Group A)            | 0.2                    |
| Test Statistic                  | Z for Proportion       |
| Reference Proportions           | Alt Ref                |
| Max Sample Size                 | 166.2558               |
| Expected Sample Size (Null Ref) | 110.3914               |
| Expected Sample Size (Alt Ref)  | 136.3264               |

| Sample Sizes (N)<br>Two-Sample Z Test for Proportion Difference |              |          |          |             |           |          |          |             |
|-----------------------------------------------------------------|--------------|----------|----------|-------------|-----------|----------|----------|-------------|
| _Stage_                                                         | Fractional N |          |          |             | Ceiling N |          |          |             |
|                                                                 | N            | N(Grp 1) | N(Grp 2) | Information | N         | N(Grp 1) | N(Grp 2) | Information |
| 1                                                               | 83.13        | 41.56    | 41.56    | 102.6       | 84        | 42       | 42       | 103.7       |
| 2                                                               | 166.26       | 83.13    | 83.13    | 205.2       | 168       | 84       | 84       | 207.4       |

| Ceiling-Adjusted Design Boundary Information (Standardized Z Scale)<br>Null Reference = 0 |                   |          |     |             |                 |          |
|-------------------------------------------------------------------------------------------|-------------------|----------|-----|-------------|-----------------|----------|
| _Stage_                                                                                   |                   |          |     | Alternative | Boundary Values |          |
|                                                                                           | Information Level |          |     | Reference   | Lower           |          |
|                                                                                           | Proportion        | Actual   | N   | Lower       | Alpha           | Beta     |
| 1                                                                                         | 0.5000            | 103.6781 | 84  | -2.34192    | -2.76841        | -0.42650 |
| 2                                                                                         | 1.0000            | 207.3562 | 168 | -3.31197    | -1.95756        | -1.95756 |

According to these results, Z test values below -2.76841 result in a rejection of the null hypothesis, while Z values above -0.42650 accept the null hypothesis.

### Distribution among groups:

| Comb<br>i | Group |       |    |       | Total |       |
|-----------|-------|-------|----|-------|-------|-------|
|           | 1     |       | 2  |       |       |       |
|           | N     | %     | N  | %     | N     | %     |
| No        | 26    | 70.27 | 31 | 73.81 | 57    | 72.15 |
| Yes       | 11    | 29.73 | 11 | 26.19 | 22    | 27.85 |
| Total     | 37    | 100.0 | 42 | 100.0 | 79    | 100.0 |

| Chi-Square | P-value for Chi-Square | Fisher's Exact Test P-value (2-Tail) |
|------------|------------------------|--------------------------------------|
| 0.122632   | 0.7262                 | 0.8039                               |

Chi squared value is 0.12, its p-value is  $0.7262 > 0.05$ , thus null hypothesis of Independence between both variables cannot be rejected

**Group 1 vs Group 2**

| p1Hat   | p2Hat   | Diff     | SE      | Z      | Side | Pr < Z |
|---------|---------|----------|---------|--------|------|--------|
| 0.29730 | 0.26190 | 0.035393 | 0.10107 | 0.3502 | 2    | 0.7262 |

**Conclusions:**

Comparing group 1 with Group 2, the statistic  $Z=0.3501 > -0.42650$  without detecting statistically significant differences when the contrast statistic was found in the área of acceptance of the null hypothesis of equality between both groups, indicating the stoppage of the study.
